# Supplementary material for: Monocarboxylate transporter 1 contributes to growth factor-induced tumor cell migration independent of transporter activity
Source: PubMed Central journal article supplement (PMC5078044; doi:10.18632/oncotarget.9016), 2016-04-26
Supplement: oncotarget-07-32695-s001.pdf [file oncotarget-07-32695-s001.pdf]

## Monocarboxylate transporter 1 contributes to growth factor-induced tumor cell migration independent of transporter activity

### Supplementary Materials

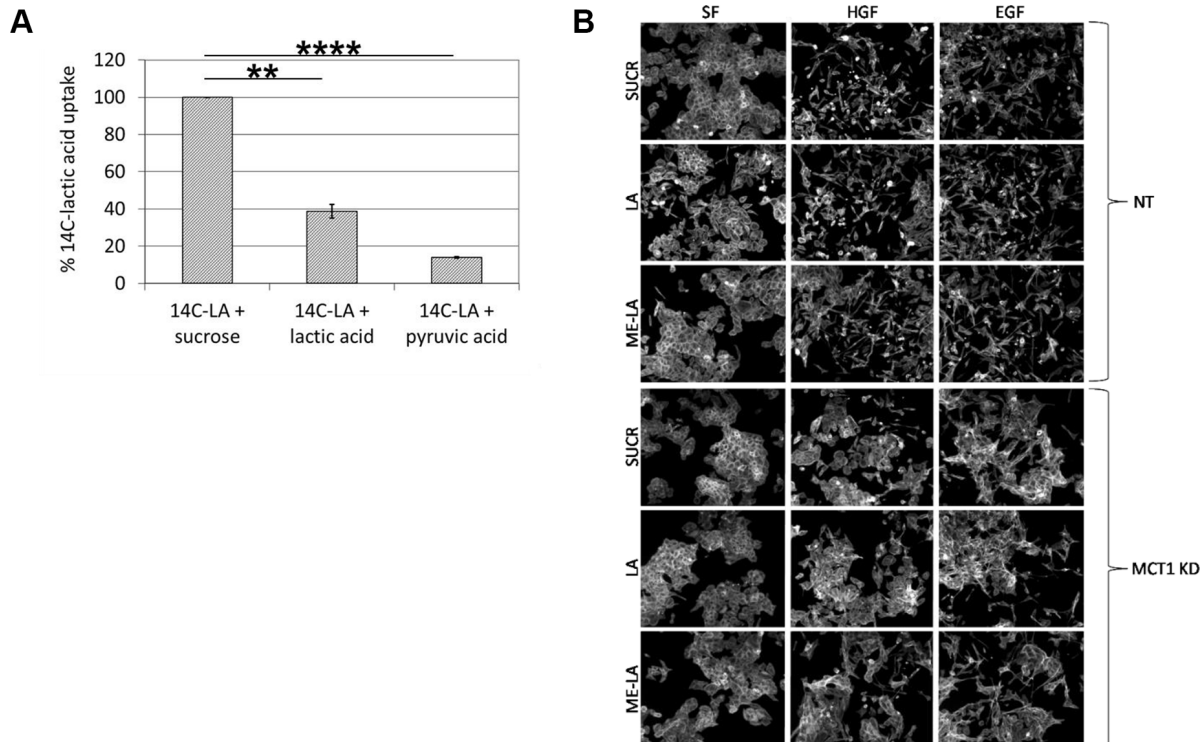

**Supplementary Figure S1: The substrates of MCT1 are not sufficient to rescue HGF- and EGF-induced cell motility in MCT1 KD cells.** (A) DU145 cells were incubated for 1 hour in HEPES buffer containing  $0.2 \mu\text{Ci/mL}$  ( $1.34 \mu\text{M}$ )  $^{14}\text{C}$ -lactic acid with 40 mM sucrose, 40 mM lactic acid, or 40 mM pyruvic acid. Data are shown as percent  $^{14}\text{C}$ -lactic acid uptake normalized to control set at 100%;  $n = 3$ . (B) DU145 NT and MCT1 KD cells were treated in serum-free (SF) media with 40 mM sucrose (SUCR), 40 mM lactic acid (LA), or 40 mM methyl-lactic acid (ME-LA) with or without 33 ng/ml HGF or 100 ng/ml EGF overnight. Cells were fixed and stained for actin. Representative  $10\times$  images are shown. Quantitative data represent mean  $\pm$  SEM.  $**p < 0.01$ ,  $****p < 0.0001$ .

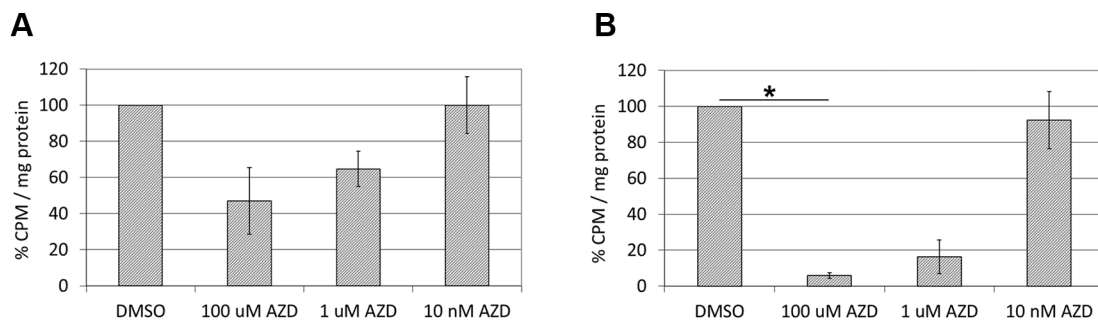

**Supplementary Figure S2: AZD3965-mediated inhibition of lactic acid uptake through MCT1 is partially obscured in cells expressing MCT4.** (A) DU145 ( $\text{MCT1}^+$ ,  $\text{MCT4}^+$ ) and (B) Raji ( $\text{MCT1}^+$ ,  $\text{MCT4}^-$ ) cells were treated with 100  $\mu\text{M}$ , 1  $\mu\text{M}$ , or 10 nM AZD3965 in HEPES buffer containing  $^{14}\text{C}$ -lactic acid for the indicated times;  $n = 3$ .  $*p < 0.05$ .
